# Supplementary material
Source: ML conference proceedings conference paper supplement (https://proceedings.neurips.cc/paper_files/paper/2016/hash/d1a21da7bca4abff8b0b61b87597de73-Abstract.html)
Supplement: Supplementary file 1 [file d1a21da7bca4abff8b0b61b87597de73-Supplemental.zip]

Archive with 1 entries (1 files):
- DAM_supplemental.pdf
